# Supplementary material for: Biocompatible anti-microbial coatings for urinary catheters
Source: Royal Society of Chemistry journal article supplement (doi:10.1039/c6ra07678e), 2016-01-01
Supplement: c6ra07678e1.pdf [file c6ra07678e1.pdf]

Supplementary Figure 1.

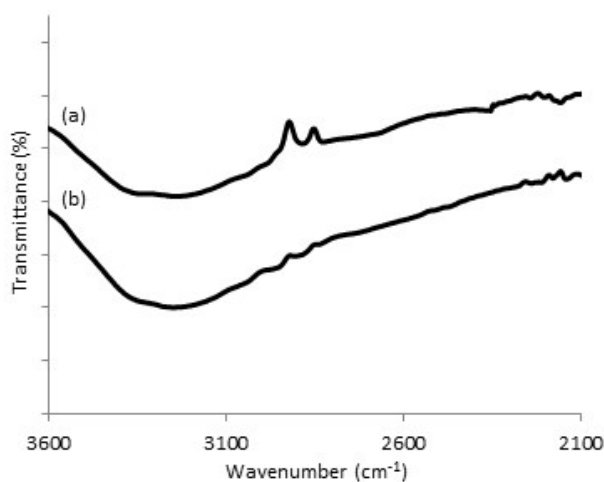

**Figure S1.** ATR-FTIR spectroscopy of (a) pDA-g-pMTAC or (b) pDA-BiBBR coated glass. Broad catechol peak is present at approximately 3260 cm<sup>-1</sup>, and peaks characteristic of pMTAC are present between 2800 and 2900 cm<sup>-1</sup>.

Supplementary Figure 2

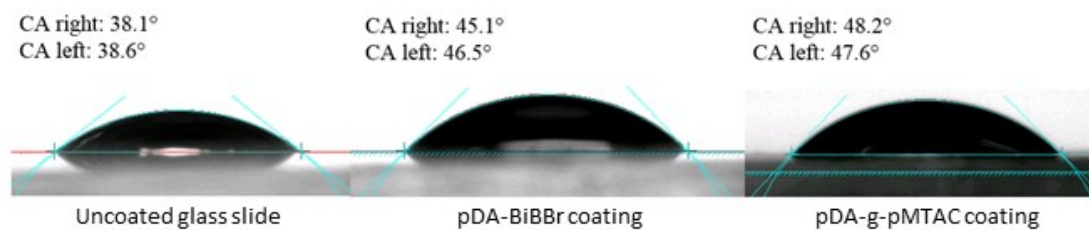

**Figure S2.** Water contact angle does not significantly change between glass slide, pDA-BiBBR and pDA-g-pMTAC surfaces.

Supplementary Table 1

**Table S1.** Water contact angle for glass slides coated with pDA-BiBBR or pDA-g-pMTAC

|             | Contact angle (°) |
|-------------|-------------------|
| Glass slide | 39.5 ± 1.0        |
| pDA-BiBBR   | 44.5 ± 5.6        |
| pDA-g-pMTAC | 46.4 ± 9.0        |

Supplementary Table 2

**Table S2.** Colony count summary represented as fold change in cell number on coated compared to uncoated.

| Repeat               | 1    | 2    | 3    | 4    | Average |
|----------------------|------|------|------|------|---------|
| <i>E. coli</i>       | 0.39 | 0.5  | 1.16 | 0.39 | 0.61    |
| <i>P. aeruginosa</i> | 0.14 | 0.08 | 2.14 | NA   | 0.79    |
